# Supplementary material for: Cytoprotective effect exerted by geraniin in HepG2 cells is through microRNA mediated regulation of BACH-1 and HO-1
Source: PubMed Central journal article supplement — BMB Rep. 2017 Nov 30;50(11):560–5. doi: 10.5483/BMBRep.2017.50.11.060 (PMC5720469; doi:10.5483/bmbrep.2017.50.11.060), 2017-11-30
Supplement: bmb-50-560_suppl.pdf [file bmb-50-560_suppl.pdf]

## Supplementary Data

**Title:** Cytoprotective effect exerted by geraniin in HepG2 cells is through microRNA mediated regulation of BACH-1 and HO-1

**Author's name:** Hoda Aayadi<sup>a</sup>, Smriti P.K. Mittal<sup>a1</sup>, Anjali Deshpande<sup>b</sup>, Makarand Gore<sup>b</sup>, Saroj S. Ghaskadbi<sup>a\*</sup>

**Affiliation:** <sup>a</sup>Department of Zoology, Savitribai Phule Pune University, Pune – 411007, India <sup>b</sup>AJ Organica Pvt. Ltd., Pune – 411007, India

<sup>1</sup>Present address: Department of Biotechnology, Savitribai Phule Pune University, Pune – 411007, India

**Running Title:** Regulation of HO-1 induction by geraniin

**Keywords:** Geraniin; Antioxidants; HO-1; Nrf-2; miRNAs

**Corresponding Author's Information:** Tel:+91-9850993508; Fax:+91-20-25690617; E-mail: [ssg@unipune.ac.in](mailto:ssg@unipune.ac.in)

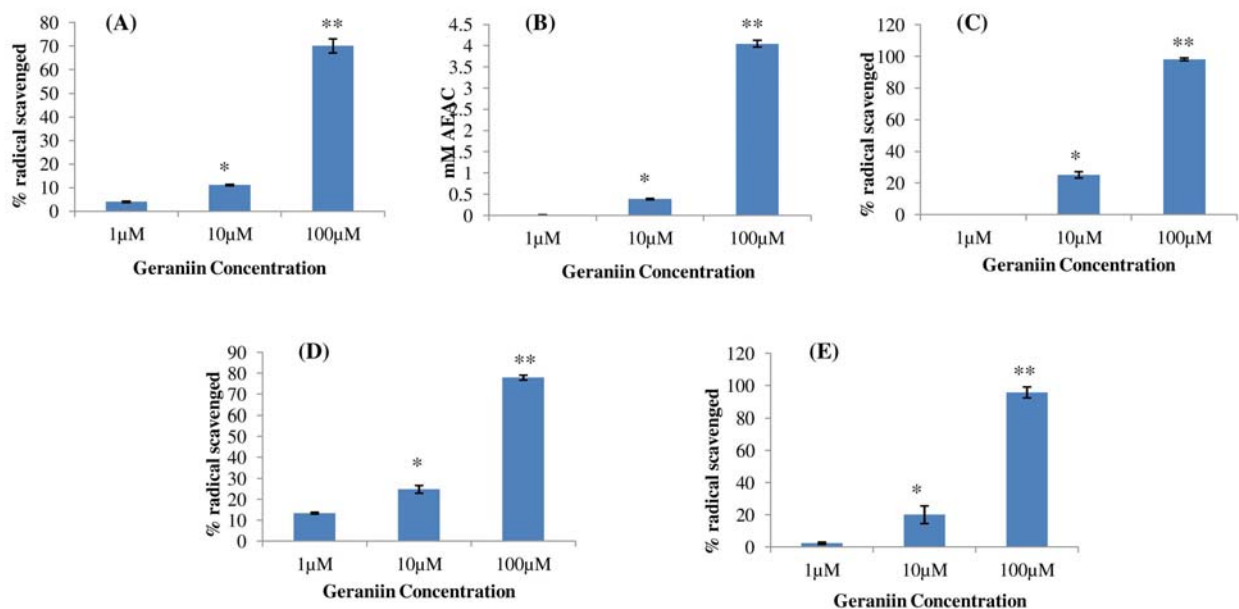

Figure 1: Radical scavenging by Geraniin. (A) DPPH, (B) FRAP Assay, (C) Superoxide radical, (D) Hydroxyl radical and (E) H<sub>2</sub>O<sub>2</sub> assay

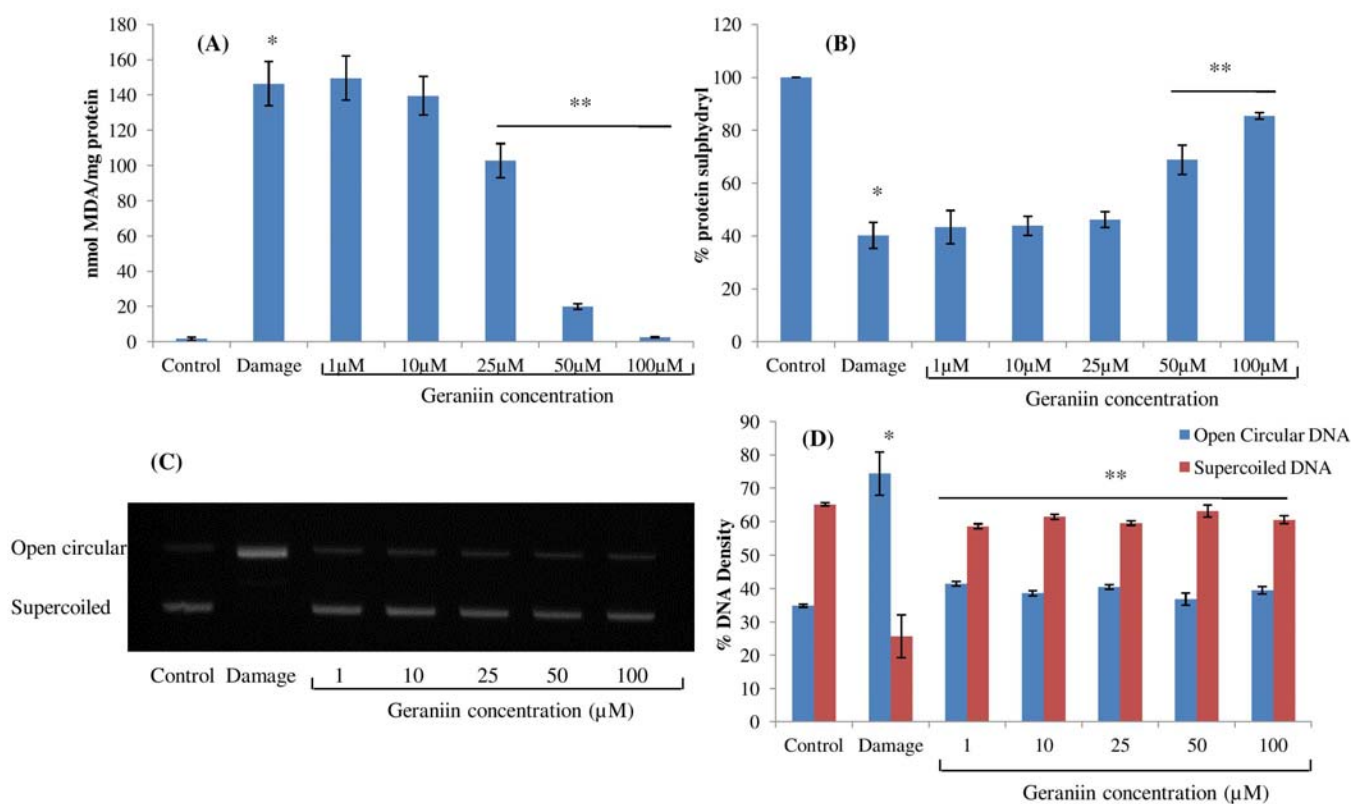

Figure 2: Protective effect of Geraniin against oxidatively damaged biomolecules. (A) Inhibition of lipid peroxide formation and (B) Restoration of protein sulphhydryl by Geraniin in oxidatively damaged rat liver mitochondria. (C) and (D) Gel electrophoresis pattern of pBR322 plasmid DNA and its densitogram analysis after induction of oxidative damage in the presence of different concentrations of Geraniin. Data shown represent the mean values of three experiments  $\pm$  SE. \* p < 0.05 vs. control. \*\* p < 0.05 vs. damage.

**Table 1: Primers used for the amplification of gene specific qRT-PCR products.**

| Gene    | Primer Sequence                                                                                                   |
|---------|-------------------------------------------------------------------------------------------------------------------|
| CAT     | Forward:5'-TGCTGAATGAGGAACAGAGG-3'<br>Reverse:5'-GTGTGAATCGCATTCTTAGG-3'                                          |
| GPx     | Forward:5'- GCGGCGGCCAGTCGGTGTA -3'<br>Reverse: 5'- GAGCTTGGGGTCGGTCATAA -3'                                      |
| SOD     | Forward:5'- TGTGGCCGATGTGTCTATTG -3'<br>Reverse: 5'- GCGTTTCCTGTCTTTC -3'                                         |
| HO-1    | Forward:5'- ACTGCGTTCCTGCTCAACAT -3'<br>Reverse: 5'- GGGCAGAATCTTGCACTTT -3'                                      |
| BACH-1  | Forward:5'- TGCGATGTCACCATCTTTGT -3'<br>Reverse: 5'- CCTGGCCTACGATTCTTGAG -3'                                     |
| GAPDH   | Forward: 5'- TCGACCACCGACTGCTTAGC -3'<br>Reverse: 5'- GGGATGGACTGTGGTTATG -3'                                     |
| Let7b   | Stem-loop: 5'- GTCGTATCCAGTGCAGGGTCCGAGGTATTCGCACTGGATACGACAACCAT -3'<br>Forward:5'- GCGCATTGAGGTAGTAGGTTGTGT -3' |
| Let7c   | Stem-loop: 5'- GTCGTATCCAGTGCAGGGTCCGAGGTATTCGCACTGGATACGACAACCAT -3'<br>Forward:5'- GCGCATTGAGGTAGTAGGTTGTAT -3' |
| miR-98  | Stem-loop: 5'- GTCGATTCCAGTGCAGGGTCCGAGGTATTCGCACTGGATACGACAACAAT -3'<br>Forward:5'- GCGCCATTGAGGTAGTAAGTTGTA -3' |
| miR-196 | Stem-loop: 5'- GTCGTATCCAGTGCAGGGTCCGAGGTATTCGCACTGGATACGACCCCAAC -3'<br>Forward:5'- GCGCATTAGGTAGTTTCCTGTTGT -3' |
| miR-217 | Stem-loop: 5'- GTCGTATCCAGTGCAGGGTCCGAGGTATTCGCACTGGATACGACTCCAAT -3'<br>Forward:5'- GCCATTACTGCATCAGGAACTGA -3'  |
| miR-377 | Stem-loop: 5'- GTCGTATCCAGTGCAGGGTCCGAGGTATTCGCACTGGATACGACACAAAA -3'<br>Forward:5'- GCGAATATCACACAAAGGCAACT -3'  |
